# Supplementary material
Source: Springer Nature journal article supplement (https://www.springermedizin.de/resource/supplementary/12943_2013_1484_MOESM8_ESM.pdf/9553124)

**A**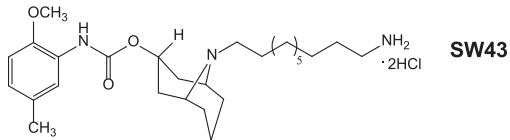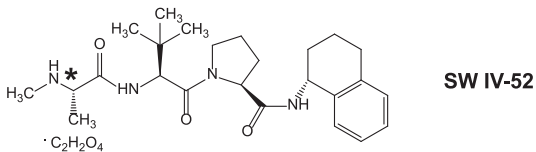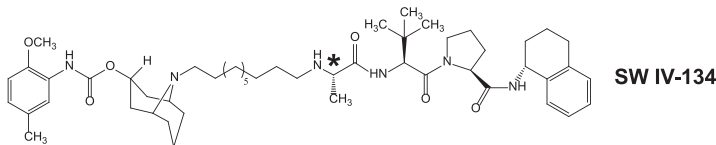**B****SKOV3**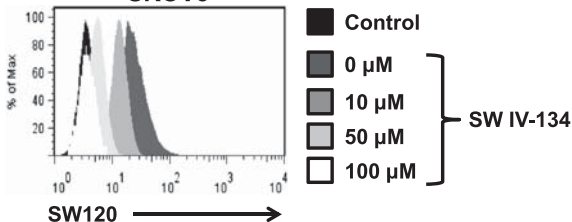

Supplement: MOESM8 [file 9553124]
